# Supplementary material for: Polymeric silver(i) complexes with pyridyl dithioether ligands: experimental and theoretical investigations on the coordination properties of the ligandsElectronic supplementary information (ESI) available: ESI-MS spectra. See http://www.rsc.org/suppdata/dt/b3/b315320g/
Source: Royal Society of Chemistry journal article supplement (doi:10.1039/b315320g), 2004-01-01
Supplement: b315320g.pdf [file b315320g.pdf]

*Supporting information for*

**Polymeric Silver(I) Complexes with Pyridyl Dithioether Ligands: Experimental and Theoretical Investigations on the Coordination Properties of the Ligands**

**Ya-Bo Xie,<sup>†</sup> Chong Zhang,<sup>†</sup> Jian-Rong Li, and Xian-He Bu<sup>\*,†,‡</sup>**

Department of Chemistry, Nankai University, Tianjin 300071, P. R. China, and the State Key Laboratory of Coordination Chemistry, Nanjing University, Nanjing 210093, P.R. China

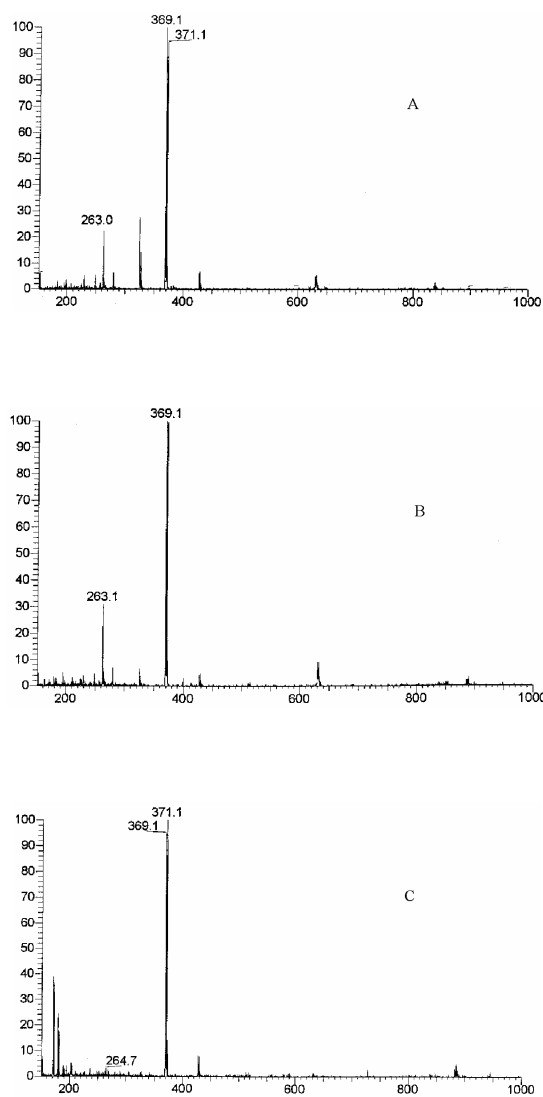

**Figure S1.** ESI-MS spectra for complexes **1** (A),  $\text{AgCF}_3\text{SO}_3\text{-L}^1$  (B), and  $\text{AgPF}_6\text{-L}^1$  (C)

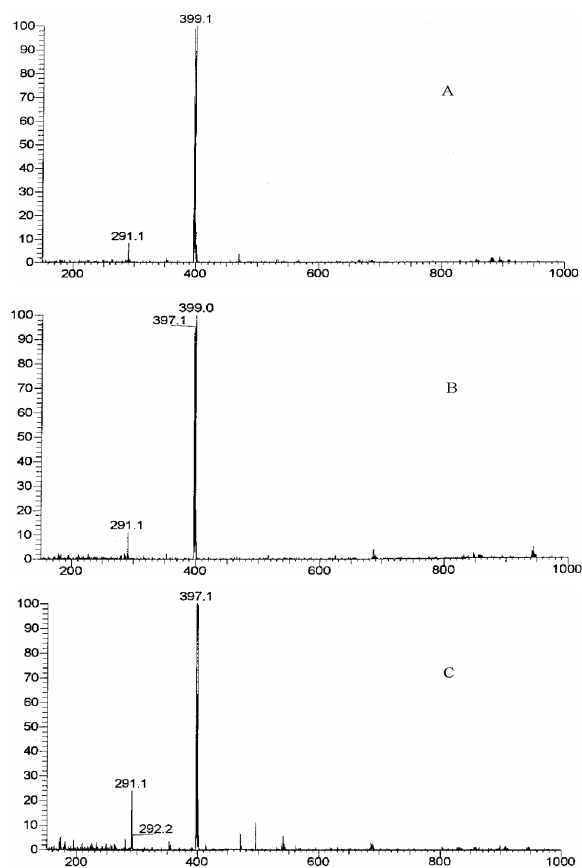

**Figure S2.** ESI-MS spectra for complexes **4** (A), **5** (B), and AgPF<sub>6</sub>-**L**<sup>3</sup> (C)
